# Supplementary material
Source: PubMed Central journal article supplement (PMC3308752)

## Legends to Supplementary Figures

**Supplementary Figure 1. BRET assay between AT<sub>1</sub>-R and KR-YFP upon AngII stimulation in HEK293 cells.** HEK293 cells were transfected with the plasmids with the indicated amounts of DNAs, and after 24 hours the cells were exposed to 100 nM AngII (solid line) or vehicle (dotted line) at the indicated time point. The BRET records are average of 3 independent experiments. BRET ratios were baseline-corrected to the vehicle curve using GraphPad Prism. Mean values  $\pm$  SEM are shown (n = 3).

**Supplementary Figure 2. Effects of agonist stimulation on the BRET interaction between 5HT-2C-R and different proteins in HEK293 cells.** HEK293 cells were transfected with the plasmids of the 5HT-2C-R-luciferase and the indicated YFP-fused proteins, and after 24 hours the cells were exposed to 10  $\mu$ M 5HT (filled rectangles) or vehicle (dashed line) at the indicated time points. BRET pairs: (A) MP-YFP and 5HT-2C-R-luciferase; (B) KR-YFP and 5HT-2C-R-luciferase; (C)  $\beta$ -arrestin2-YFP and 5HT-2C-R-luciferase; (D) Rab5-YFP and 5HT-2C-R-luciferase. The BRET records are average of 3 independent experiments. Mean values  $\pm$  SEM are shown (n = 3).

**Supplementary Figure 3. The effect of EGF on the interaction of the EGF-R with different proteins in HEK293 cells.** HEK293 cells were transfected with EGF-R-luciferase and the indicated YFP-fused proteins, and after 24 hours the cells were exposed to 50 ng/ml EGF (filled rectangles) or vehicle (dashed line) at the indicated time points. BRET pairs: (A) MP-YFP and EGF-R-luciferase; (B) KR-YFP and EGF-R-luciferase; (C)  $\beta$ -arrestin2-YFP and EGF-R-luciferase; (D) Rab5-YFP and EGF-R-luciferase. The BRET records are average of 3 independent experiments. Mean values  $\pm$  SEM are shown (n = 3).

# Supplementary Fig. 1

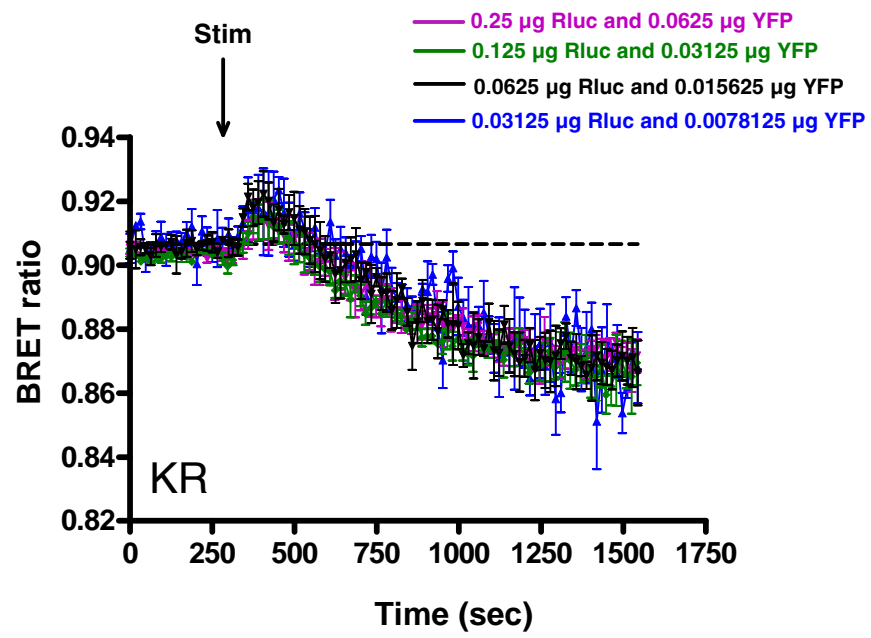

# Supplementary Fig. 2

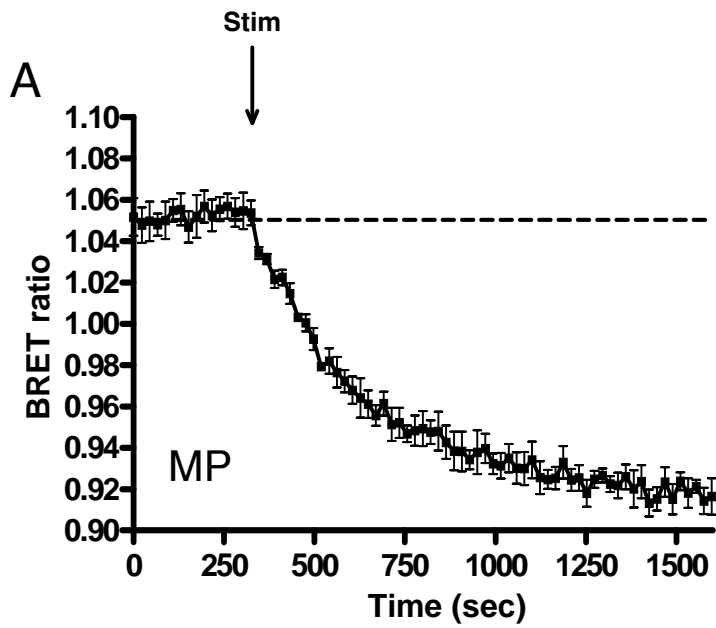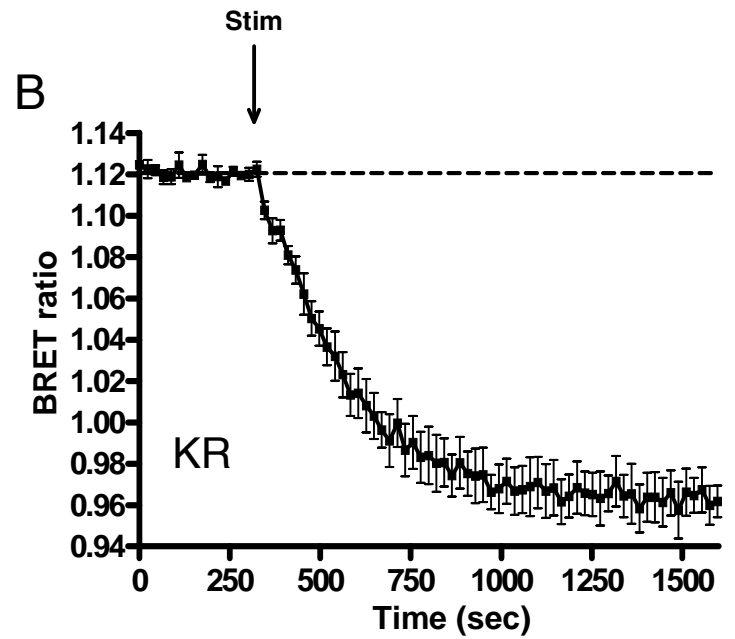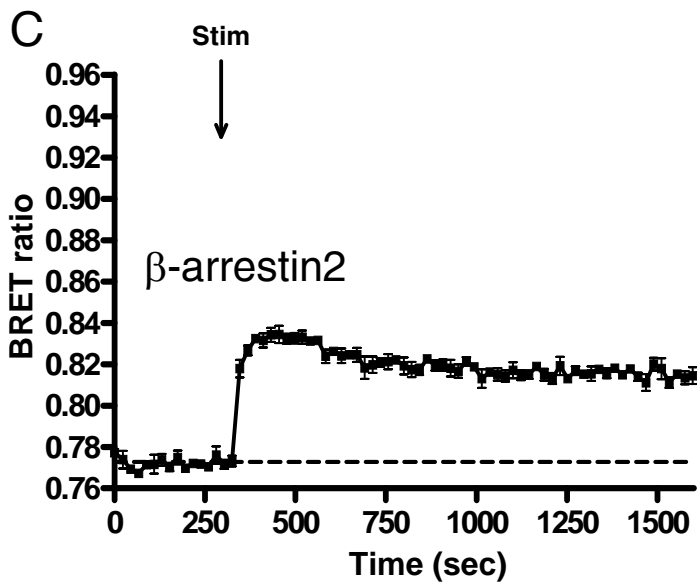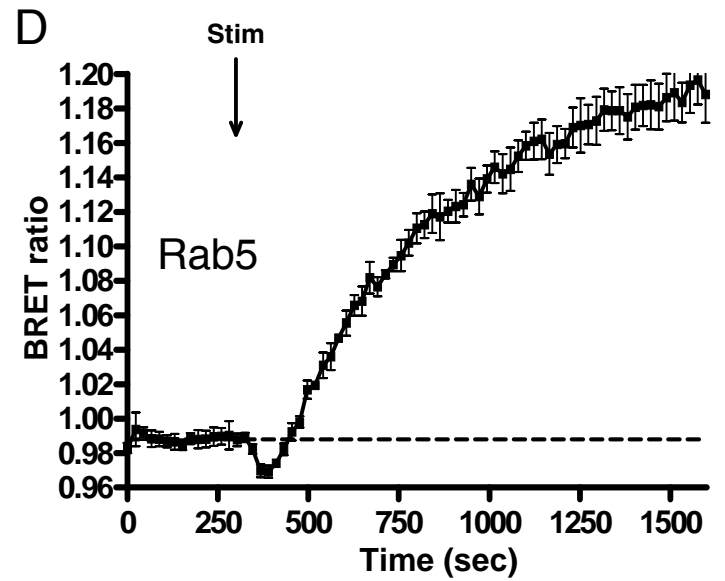

# Supplementary Fig. 3

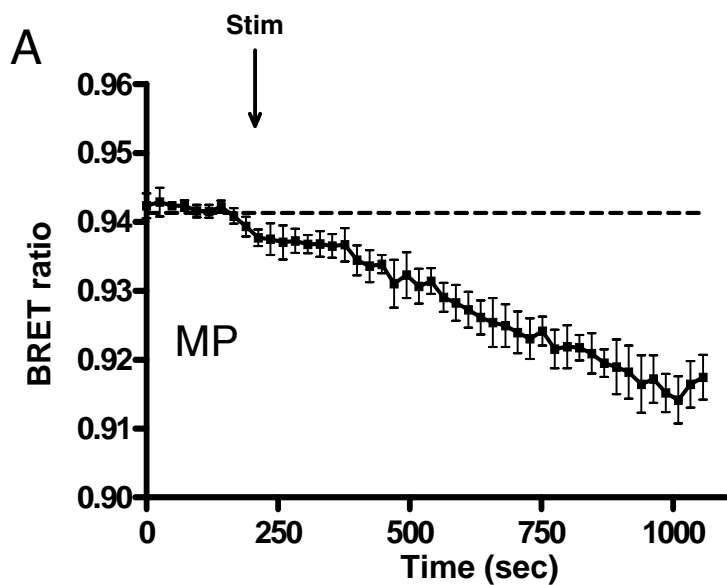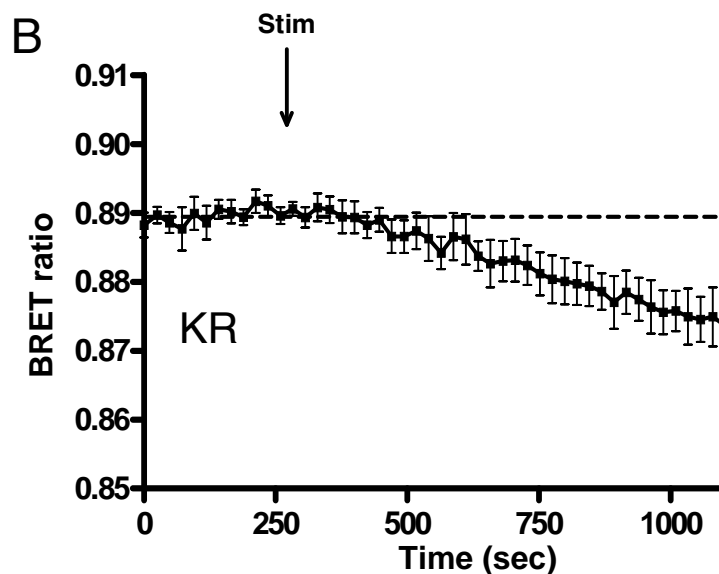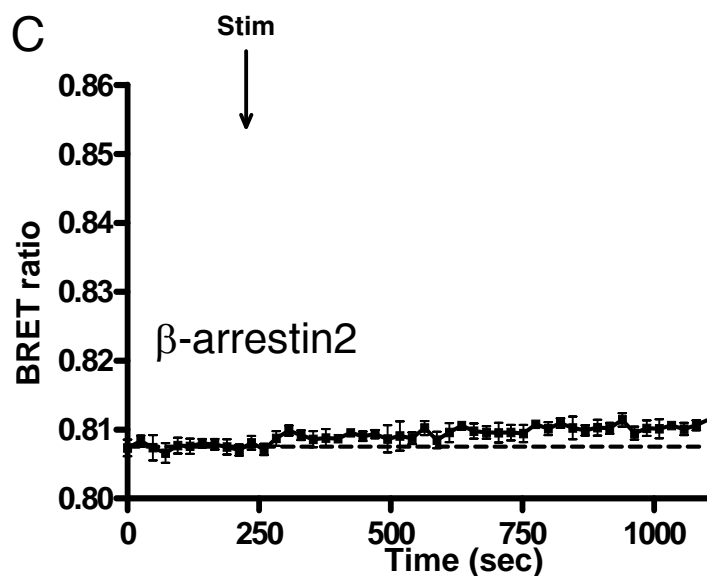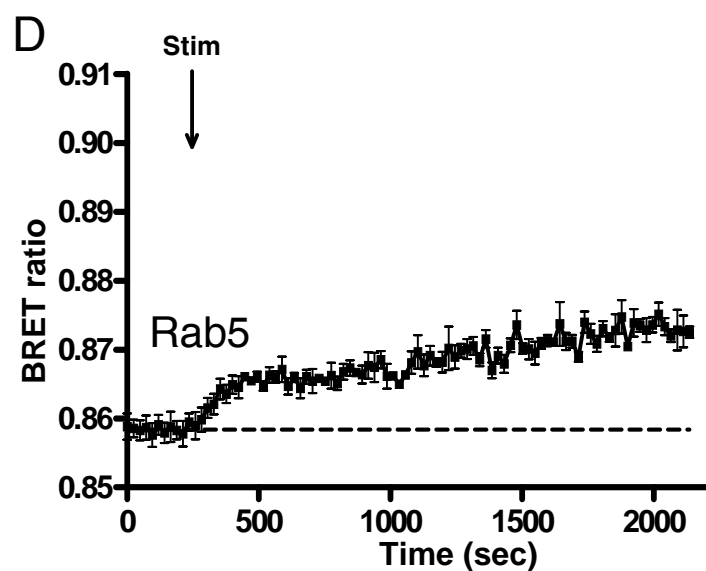

Supplement: supp_M111.293944_jbc.M111.293944-1.pdf [file supp_M111.293944_jbc.M111.293944-1.pdf]
